# Supplementary material for: Radiotherapy-induced cell death activates paracrine HMGB1-TLR2 signaling and accelerates pancreatic carcinoma metastasis
Source: PubMed Central journal article supplement (PMC5883315; doi:10.1186/s13046-018-0726-2), 2018-04-03
Supplement: 13046_2018_726_MOESM1_ESM.pdf [file 13046_2018_726_MOESM1_ESM.pdf]

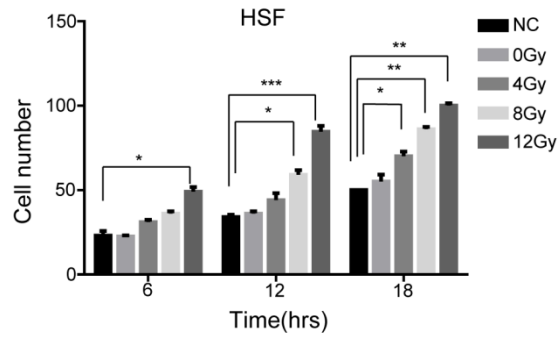

**Fig. S1** Irradiation-induced fibroblast cell death promotes cancer cell metastasis in vitro. Varied-dose X-ray (0, 4, 8, and 12Gy) treated fibroblast cells seeded in the lower chamber and Panc-1 and SW1990 cells in the upper chamber co-cultured in the transwell system for the indicated time (6, 12, and 18h). Imagings were taken by electron microscope. Magnification:  $\times 20$ . Experiments were repeated three times and the data were expressed as mean $\pm$ SEM. \*  $p < 0.05$ , \*\*  $p < 0.01$ , \*\*\*  $p < 0.001$ .
